# Supplementary material for: Perinatal Posttraumatic Stress Disorder Diagnoses Among Commercially Insured People Increased, 2008–20
Source: PubMed Central journal article supplement (PMC11225106; doi:10.1377/hlthaff.2023.01447), 2024-04
Supplement: NIHMS1996632-supplement-Appendix.pdf [file NIHMS1996632-supplement-Appendix.pdf]

## Appendix

### Appendix Exhibits

Supplemental Exhibit 1. Codes used to identify delivery hospitalizations for live birth.

Supplemental Exhibit 2. Codes used to identify PTSD diagnoses.

Supplemental Exhibit 3. Codes used to identify PMAD diagnoses.

Supplemental Exhibit 4. Sociodemographic characteristics of delivering individuals with PTSD 2008-2020.

Supplemental Exhibit 5. Sociodemographic characteristics of delivering individuals without PTSD 2008-2020.

Supplemental Exhibit 6. Forest plot of adjusted odds of PTSD diagnosis.

Supplemental Exhibit 7. Adjusted odds of PTSD diagnosis among those with and without PMAD.

Supplemental Exhibit 8. Forest plot of adjusted odds of PTSD diagnosis among those (a) with and (b) without PMAD.

### Technical Appendix

Multivariate Logistic Regression

## Supplemental Exhibit 1. Codes used to identify delivery hospitalizations for live birth.

*Included: Cesarean and vaginal delivery*

|                      | Cesarean delivery                                                                                           | Vaginal delivery                                             |
|----------------------|-------------------------------------------------------------------------------------------------------------|--------------------------------------------------------------|
| ICD-9-CM procedures  | 740, 741, 742, 744, 7499                                                                                    |                                                              |
| ICD-10-CM procedures | 10D00Z0, 10D00Z1, 10D00Z2                                                                                   | 10D07Z3, 10D07Z4, 10D07Z5, 10D07Z6, 10D07Z7, 10D07Z8, 10E0ZZ |
| DRG                  | 370, 371, 765, 766, 540, 5401, 5402, 5403, 372, 373, 374, 375, 767 768, 774, 775, 541, 542, 560, 5411, 5404 | 5412, 5413, 5414, 5421, 5422, 5423, 5424, 5601, 5602, 5603   |
| CPT                  | 59510, 59514, 59515, 59618, 59620, 59622                                                                    | 59400, 59409, 59410, 59610, 59612, 59614                     |

*Included: Pre-term birth*

|                  |                                                                                                                                                                                                                                                                  |
|------------------|------------------------------------------------------------------------------------------------------------------------------------------------------------------------------------------------------------------------------------------------------------------|
| ICD 10 diagnoses | O601, O6010, O60100, O60101, O60102, O60103, O60104, O60105, O60109, O6012, O60120, O60121, O60122, O60123, O60124, O60125, O60129, O6013, O60130, O60131, O60132, O60133, O60134, O60135, O60139, O6014, O60140, O60141, O60142, O60143, O60144, O60145, O60149 |
| ICD 9 diagnoses  | 64420, 64421                                                                                                                                                                                                                                                     |

*Excluded: abortion, dilatation and curettage, and stillbirth*

|                              |                                                                       |                                                                                                                                                                                                                 |
|------------------------------|-----------------------------------------------------------------------|-----------------------------------------------------------------------------------------------------------------------------------------------------------------------------------------------------------------|
| ICD procedures and CPT codes | Removal of ectopic pregnancy                                          | 59120, 59121, 59130, 59135, 59136, 59140, 59150, 59151, 743                                                                                                                                                     |
|                              | Abortion (termination of pregnancy)                                   | 59840, 59841, 59850, 59851, 59852, 59855, 59856, 59857, 10A00ZZ, 10A03ZZ, 10A04ZZ, 10A07Z, 10A07ZZ, 10A08ZZ, 10A08ZZ, 6901, 6951, 7491, 750                                                                     |
|                              | Dilatation and curettage (D&C); aspiration after delivery or abortion | 59812, 59820, 59821, 59830                                                                                                                                                                                      |
| ICD 9 and 10 diagnoses       | Removal of ectopic pregnancy                                          | O0000, O0001, O00101, O00102, O00109, O00111, O00112, O00119, O00201, O00202, O00209, O00211, O00212, O00219, O0080, O0081, O0090, O0091, 63300, 63301, 63310, 63311, 63320, 63321, 63380, 63381, 63390, 63391, |

|                                     |                                                                                                                                                                                                                                                                                                                                                                                                                                                                                                                                                                                                                                                                                                                                                                                                                                                                                                                                                                                                                                                                                                                                                                                                                                                                                                                                                                                                                                                                                                                                                                                    |
|-------------------------------------|------------------------------------------------------------------------------------------------------------------------------------------------------------------------------------------------------------------------------------------------------------------------------------------------------------------------------------------------------------------------------------------------------------------------------------------------------------------------------------------------------------------------------------------------------------------------------------------------------------------------------------------------------------------------------------------------------------------------------------------------------------------------------------------------------------------------------------------------------------------------------------------------------------------------------------------------------------------------------------------------------------------------------------------------------------------------------------------------------------------------------------------------------------------------------------------------------------------------------------------------------------------------------------------------------------------------------------------------------------------------------------------------------------------------------------------------------------------------------------------------------------------------------------------------------------------------------------|
| Abortion (termination of pregnancy) | O030, O031, O032, O0330, O0331, O0332, O0333, O0334, O0337, O0339, O034, O035, O036, O037, O0380, O0381, O0382, O0383, O0384, O0385, O0386, O0387, O0388, O0389, O039, 63400, 63401, 63402, 63410, 63411, 63412, 63420, 63421, 63422, 63430, 63431, 63432, 63440, 63441, 63442, 63450, 63451, 63452, 63460, 63461, 63462, 63470, 63471, 63472, 63480, 63481, 63482, 63490, 63491, 63492, O045, O045, O045, O046, O046, O046, O047, O047, O047, O0480, O0480, O0480, O0481, O0481, O0481, O0482, O0482, O0482, O0483, O0483, O0483, O0484, O0484, O0484, O0485, O0486, O0487, O0488, O0489, O0489, O0489, O070, O071, O072, O0730, O0731, O0732, O0733, O0734, O0735, O0736, O0737, O0738, O0739, O074, Z332, Z332, Z332, 63500, 63501, 63502, 63510, 63511, 63512, 63520, 63521, 63522, 63530, 63531, 63532, 63540, 63541, 63542, 63550, 63551, 63552, 63560, 63561, 63562, 63570, 63571, 63572, 63580, 63581, 63582, 63590, 63591, 63592, 63600, 63601, 63602, 63610, 63611, 63612, 63620, 63621, 63622, 63630, 63631, 63632, 63640, 63641, 63642, 63650, 63651, 63652, 63660, 63661, 63662, 63670, 63671, 63672, 63680, 63681, 63682, 63690, 63691, 63692, 63700, 63701, 63702, 63710, 63711, 63712, 63720, 63721, 63722, 63730, 63731, 63732, 63740, 63741, 63742, 63750, 63751, 63752, 63760, 63761, 63762, 63770, 63771, 63772, 63780, 63781, 63782, 63790, 63791, 63792, 6380, 6381, 6382, 6383, 6384, 6385, 6386, 6387, 6388, 6389, O080, O081, O082, O083, O084, O085, O086, O087, O0881, O0882, O0883, O0889, O089, 6390, 6391, 6392, 6393, 6394, 6395, 6396, 6398, 6399, |
| Other complications                 | O019, O021, O0289, Z371, Z374, Z377, 630, 6310, 6318, 632, V271, V274, V277, A34                                                                                                                                                                                                                                                                                                                                                                                                                                                                                                                                                                                                                                                                                                                                                                                                                                                                                                                                                                                                                                                                                                                                                                                                                                                                                                                                                                                                                                                                                                   |

**Supplemental Exhibit 2. Codes used to identify PTSD diagnoses.**

|           |                     |
|-----------|---------------------|
| ICD-9-CM  | 30981               |
| ICD-10-CM | F4310, F4311, F4312 |

**Supplemental Exhibit 3. Codes used to identify PMAD diagnoses.**

| Group      | ICD Diagnosis Code                                    |
|------------|-------------------------------------------------------|
| Anxiety    | 300, 308, 313, 293, F06, F40, F41, F42, F43, F48, R45 |
| Depression | 311, 296, 300, F32, F33                               |

**Supplemental Exhibit 4. Sociodemographic characteristics of delivering individuals with PTSD 2008-2020.**

|                | 2008        | 2009        | 2010        | 2011        | 2012        | 2013        | 2014        | 2015        | 2016        | 2017        | 2018        | 2019        | 2020        |
|----------------|-------------|-------------|-------------|-------------|-------------|-------------|-------------|-------------|-------------|-------------|-------------|-------------|-------------|
|                | (n=240)     | (n=280)     | (n=252)     | (n=315)     | (n=327)     | (n=316)     | (n=326)     | (n=440)     | (n=502)     | (n=592)     | (n=710)     | (n=821)     | (n=954)     |
| Age            |             |             |             |             |             |             |             |             |             |             |             |             |             |
| 15-26          | 60 (25%)    | 75 (26.8%)  | 60 (23.8%)  | 82 (26%)    | 98 (30%)    | 100 (31.6%) | 81 (24.8%)  | 140 (31.8%) | 159 (31.7%) | 179 (30.2%) | 184 (25.9%) | 220 (26.8%) | 263 (27.6%) |
| 27-34          | 102 (42.5%) | 115 (41.1%) | 122 (48.4%) | 152 (48.3%) | 133 (40.7%) | 124 (39.2%) | 136 (41.7%) | 175 (39.8%) | 203 (40.4%) | 237 (40%)   | 304 (42.8%) | 364 (44.3%) | 437 (45.8%) |
| 35-39          | 52 (21.7%)  | 59 (21.1%)  | 52 (20.6%)  | 57 (18.1%)  | 63 (19.3%)  | 70 (22.2%)  | 92 (28.2%)  | 94 (21.4%)  | 109 (21.7%) | 147 (24.8%) | 167 (23.5%) | 170 (20.7%) | 202 (21.2%) |
| 40+            | 26 (10.8%)  | 31 (11.1%)  | 18 (7.1%)   | 24 (7.6%)   | 33 (10.1%)  | 22 (7%)     | 17 (5.2%)   | 31 (7%)     | 31 (6.2%)   | 29 (4.9%)   | 55 (7.7%)   | 67 (8.2%)   | 52 (5.5%)   |
| OBCMI Score    |             |             |             |             |             |             |             |             |             |             |             |             |             |
| 0-1            | 173 (72.1%) | 194 (69.3%) | 175 (69.4%) | 223 (70.8%) | 219 (67%)   | 221 (69.9%) | 211 (64.7%) | 292 (66.4%) | 320 (63.7%) | 388 (65.5%) | 450 (63.4%) | 526 (64.1%) | 634 (66.5%) |
| 2+             | 67 (27.9%)  | 86 (30.7%)  | 77 (30.6%)  | 92 (29.2%)  | 108 (33%)   | 95 (30.1%)  | 115 (35.3%) | 148 (33.6%) | 182 (36.3%) | 204 (34.5%) | 260 (36.6%) | 295 (35.9%) | 320 (33.5%) |
| PMAD           |             |             |             |             |             |             |             |             |             |             |             |             |             |
| No             | 73 (30.4%)  | 77 (27.5%)  | 42 (16.7%)  | 64 (20.3%)  | 70 (21.4%)  | 61 (19.3%)  | 72 (22.1%)  | 69 (15.7%)  | 89 (17.7%)  | 91 (15.4%)  | 99 (13.9%)  | 125 (15.2%) | 130 (13.6%) |
| Yes            | 167 (69.6%) | 203 (72.5%) | 210 (83.3%) | 251 (79.7%) | 257 (78.6%) | 255 (80.7%) | 254 (77.9%) | 371 (84.3%) | 413 (82.3%) | 501 (84.6%) | 611 (86.1%) | 696 (84.8%) | 824 (86.4%) |
| Poverty        |             |             |             |             |             |             |             |             |             |             |             |             |             |
| <250%          | 22 (9.2%)   | 37 (13.2%)  | 46 (18.3%)  | 74 (23.5%)  | 72 (22%)    | 62 (19.6%)  | 65 (19.9%)  | 92 (20.9%)  | 122 (24.3%) | 162 (27.4%) | 219 (30.8%) | 247 (30.1%) | 283 (29.7%) |
| 250-400%       | 43 (17.9%)  | 62 (22.1%)  | 51 (20.2%)  | 60 (19%)    | 73 (22.3%)  | 63 (19.9%)  | 69 (21.2%)  | 91 (20.7%)  | 95 (18.9%)  | 181 (30.6%) | 230 (32.4%) | 241 (29.4%) | 247 (25.9%) |
| >400%          | 112 (46.7%) | 110 (39.3%) | 103 (40.9%) | 119 (37.8%) | 124 (37.9%) | 112 (35.4%) | 121 (37.1%) | 165 (37.5%) | 164 (32.7%) | 178 (30.1%) | 204 (28.7%) | 235 (28.6%) | 292 (30.6%) |
| Unknown        | 63 (26.3%)  | 71 (25.4%)  | 52 (20.6%)  | 62 (19.7%)  | 58 (17.7%)  | 79 (25%)    | 71 (21.8%)  | 92 (20.9%)  | 121 (24.1%) | 71 (12%)    | 57 (8%)     | 98 (11.9%)  | 132 (13.8%) |
| Race/ethnicity |             |             |             |             |             |             |             |             |             |             |             |             |             |
| Asian          | **          | **          | **          | **          | **          | **          | **          | **          | 21 (4.2%)   | 21 (3.5%)   | 20 (2.8%)   | 23 (2.8%)   | 32 (3.4%)   |
| Black          | 15 (6.3%)   | 17 (6.1%)   | 26 (10.3%)  | 29 (9.2%)   | 23 (7%)     | 23 (7.3%)   | 33 (10.1%)  | 30 (6.8%)   | 48 (9.6%)   | 60 (10.1%)  | 66 (9.3%)   | 75 (9.1%)   | 94 (9.9%)   |
| Hispanic       | 16 (6.7%)   | 26 (9.3%)   | 32 (12.7%)  | 41 (13%)    | 32 (9.8%)   | 27 (8.5%)   | 38 (11.7%)  | 47 (10.7%)  | 57 (11.4%)  | 67 (11.3%)  | 71 (10%)    | 76 (9.3%)   | 103 (10.8%) |
| Unknown        | **          | **          | **          | **          | **          | **          | **          | **          | 14 (2.8%)   | 15 (2.5%)   | 18 (2.5%)   | 56 (6.8%)   | 85 (8.9%)   |
| White          | 178 (74.2%) | 206 (73.6%) | 173 (68.7%) | 225 (71.4%) | 253 (77.4%) | 237 (75%)   | 228 (69.9%) | 341 (77.5%) | 362 (72.1%) | 429 (72.5%) | 535 (75.4%) | 591 (72%)   | 640 (67.1%) |

**Supplemental Exhibit 5. Sociodemographic characteristics of delivering individuals without PTSD 2008-2020.**

|             | 2008              | 2009              | 2010              | 2011              | 2012              | 2013              | 2014              | 2015              | 2016              | 2017              | 2018              | 2019              | 2020              |
|-------------|-------------------|-------------------|-------------------|-------------------|-------------------|-------------------|-------------------|-------------------|-------------------|-------------------|-------------------|-------------------|-------------------|
|             | (n=63470)         | (n=62165)         | (n=61386)         | (n=59964)         | (n=60531)         | (n=54220)         | (n=52862)         | (n=53051)         | (n=53464)         | (n=53272)         | (n=53820)         | (n=51779)         | (n=50266)         |
| Age         |                   |                   |                   |                   |                   |                   |                   |                   |                   |                   |                   |                   |                   |
| 15-26       | 10,965<br>(17.3%) | 10,385<br>(16.7%) | 10,268<br>(16.7%) | 10,083<br>(16.8%) | 11,199<br>(18.5%) | 10,169<br>(18.8%) | 9,451<br>(17.9%)  | 9,335<br>(17.6%)  | 9,005<br>(16.8%)  | 8,547 (16%)       | 8,263<br>(15.4%)  | 7,571<br>(14.6%)  | 7,181<br>(14.3%)  |
| 27-34       | 34,176<br>(53.8%) | 34,221<br>(55%)   | 34,241<br>(55.8%) | 33,429<br>(55.7%) | 33,051<br>(54.6%) | 29,423<br>(54.3%) | 28,864<br>(54.6%) | 28,695<br>(54.1%) | 29,129<br>(54.5%) | 28,827<br>(54.1%) | 28,984<br>(53.9%) | 27,909<br>(53.9%) | 27,051<br>(53.8%) |
| 35-39       | 14,452<br>(22.8%) | 13,859<br>(22.3%) | 13,012<br>(21.2%) | 12,665<br>(21.1%) | 12,680<br>(20.9%) | 11,633<br>(21.5%) | 11,717<br>(22.2%) | 12,131<br>(22.9%) | 12,449<br>(23.3%) | 12,893<br>(24.2%) | 13,458<br>(25%)   | 13,244<br>(25.6%) | 12,948<br>(25.8%) |
| 40+         | 3,877<br>(6.1%)   | 3,700 (6%)        | 3,865 (6.3%)      | 3,787 (6.3%)      | 3,601 (5.9%)      | 2,995 (5.5%)      | 2,830 (5.4%)      | 2,890 (5.4%)      | 2,881 (5.4%)      | 3,005 (5.6%)      | 3,115 (5.8%)      | 3,055 (5.9%)      | 3,086 (6.1%)      |
| OBCMI Score |                   |                   |                   |                   |                   |                   |                   |                   |                   |                   |                   |                   |                   |
| 0-1         | 49,917<br>(78.6%) | 48,720<br>(78.4%) | 47,988<br>(78.2%) | 46,910<br>(78.2%) | 47,510<br>(78.5%) | 42,752<br>(78.8%) | 41,763<br>(79%)   | 41,166<br>(77.6%) | 40,974<br>(76.6%) | 40,292<br>(75.6%) | 40,283<br>(74.8%) | 38,343<br>(74.1%) | 37,149<br>(73.9%) |
| 2+          | 13,553<br>(21.4%) | 13,445<br>(21.6%) | 13,398<br>(21.8%) | 13,054<br>(21.8%) | 13,021<br>(21.5%) | 11,468<br>(21.2%) | 11,099<br>(21%)   | 11,885<br>(22.4%) | 12,490<br>(23.4%) | 12,980<br>(24.4%) | 13,537<br>(25.2%) | 13,436<br>(25.9%) | 13,117<br>(26.1%) |
| PMAD        |                   |                   |                   |                   |                   |                   |                   |                   |                   |                   |                   |                   |                   |
| No          | 54,387<br>(85.7%) | 52,765<br>(84.9%) | 51,816<br>(84.4%) | 50,385<br>(84%)   | 50,447<br>(83.3%) | 45,120<br>(83.2%) | 43,818<br>(82.9%) | 43,392<br>(81.8%) | 43,198<br>(80.8%) | 42,242<br>(79.3%) | 41,757<br>(77.6%) | 39,183<br>(75.7%) | 36,669<br>(72.9%) |
| Yes         | 9,083<br>(14.3%)  | 9,400<br>(15.1%)  | 9,570<br>(15.6%)  | 9,579 (16%)       | 10,084<br>(16.7%) | 9,100<br>(16.8%)  | 9,044<br>(17.1%)  | 9,659<br>(18.2%)  | 10,266<br>(19.2%) | 11,030<br>(20.7%) | 12,063<br>(22.4%) | 12,596<br>(24.3%) | 13,597<br>(27.1%) |
| Poverty     |                   |                   |                   |                   |                   |                   |                   |                   |                   |                   |                   |                   |                   |
| <250%       | 7,224<br>(11.4%)  | 7,547<br>(12.1%)  | 7,760<br>(12.6%)  | 8,323<br>(13.9%)  | 8,895<br>(14.7%)  | 8,079<br>(14.9%)  | 9,202<br>(17.4%)  | 9,565<br>(18%)    | 10,545<br>(19.7%) | 11,883<br>(22.3%) | 12,574<br>(23.4%) | 12,625<br>(24.4%) | 11,818<br>(23.5%) |
| 250-400%    | 9,770<br>(15.4%)  | 12,177<br>(19.6%) | 12,319<br>(20.1%) | 12,668<br>(21.1%) | 13,201<br>(21.8%) | 11,236<br>(20.7%) | 10,009<br>(18.9%) | 10,050<br>(18.9%) | 9,397<br>(17.6%)  | 14,871<br>(27.9%) | 16,883<br>(31.4%) | 14,639<br>(28.3%) | 12,971<br>(25.8%) |
| >400%       | 31,977<br>(50.4%) | 28,837<br>(46.4%) | 28,581<br>(46.6%) | 27,315<br>(45.6%) | 26,865<br>(44.4%) | 24,073<br>(44.4%) | 23,678<br>(44.8%) | 23,724<br>(44.7%) | 23,577<br>(44.1%) | 21,047<br>(39.5%) | 19,086<br>(35.5%) | 18,342<br>(35.4%) | 17,876<br>(35.6%) |
| Unknown     | 14,499<br>(22.8%) | 13,604<br>(21.9%) | 12,726<br>(20.7%) | 11,658<br>(19.4%) | 11,570<br>(19.1%) | 10,832<br>(20%)   | 9,973<br>(18.9%)  | 9,712<br>(18.3%)  | 9,945<br>(18.6%)  | 5,471<br>(10.3%)  | 5,277 (9.8%)      | 6,173<br>(11.9%)  | 7,601<br>(15.1%)  |



| Race/ethnicity |                  |                   |                   |                   |                   |                   |                   |                   |                   |                   |                   |                   |                   |
|----------------|------------------|-------------------|-------------------|-------------------|-------------------|-------------------|-------------------|-------------------|-------------------|-------------------|-------------------|-------------------|-------------------|
| Asian          | 4,223<br>(6.7%)  | 4,556 (7.3%)      | 4,354 (7.1%)      | 4,495 (7.5%)      | 4,728 (7.8%)      | 4,480 (8.3%)      | 4,567 (8.6%)      | 4,534 (8.5%)      | 4,631 (8.7%)      | 4,725 (8.9%)      | 4,665 (8.7%)      | 3,853 (7.4%)      | 3,364 (6.7%)      |
| Black          | 5,681 (9%)       | 5,848 (9.4%)      | 6,106 (9.9%)      | 5,750 (9.6%)      | 5,794 (9.6%)      | 4,482 (8.3%)      | 4,427 (8.4%)      | 4,425 (8.3%)      | 4,607 (8.6%)      | 4,638 (8.7%)      | 4,818 (9%)        | 4,424 (8.5%)      | 4,137 (8.2%)      |
| Hispanic       | 7,941<br>(12.5%) | 7,424<br>(11.9%)  | 7,610<br>(12.4%)  | 7,268<br>(12.1%)  | 7,406<br>(12.2%)  | 7,136<br>(13.2%)  | 7,149<br>(13.5%)  | 7,303<br>(13.8%)  | 7,341<br>(13.7%)  | 7,538<br>(14.2%)  | 7,567<br>(14.1%)  | 7,018<br>(13.6%)  | 6,390<br>(12.7%)  |
| Unknown        | 6,935<br>(10.9%) | 5,549 (8.9%)      | 4,548 (7.4%)      | 3,513 (5.9%)      | 2,759 (4.6%)      | 2,041 (3.8%)      | 1,535 (2.9%)      | 1,380 (2.6%)      | 1,392 (2.6%)      | 1,149 (2.2%)      | 1,409 (2.6%)      | 3,432 (6.6%)      | 5,419<br>(10.8%)  |
| White          | 38,690<br>(61%)  | 38,788<br>(62.4%) | 38,768<br>(63.2%) | 38,938<br>(64.9%) | 39,844<br>(65.8%) | 36,081<br>(66.5%) | 35,184<br>(66.6%) | 35,409<br>(66.7%) | 35,493<br>(66.4%) | 35,222<br>(66.1%) | 35,361<br>(65.7%) | 33,052<br>(63.8%) | 30,956<br>(61.6%) |

Supplemental Exhibit 6. Forest plot of adjusted odds of PTSD diagnosis.

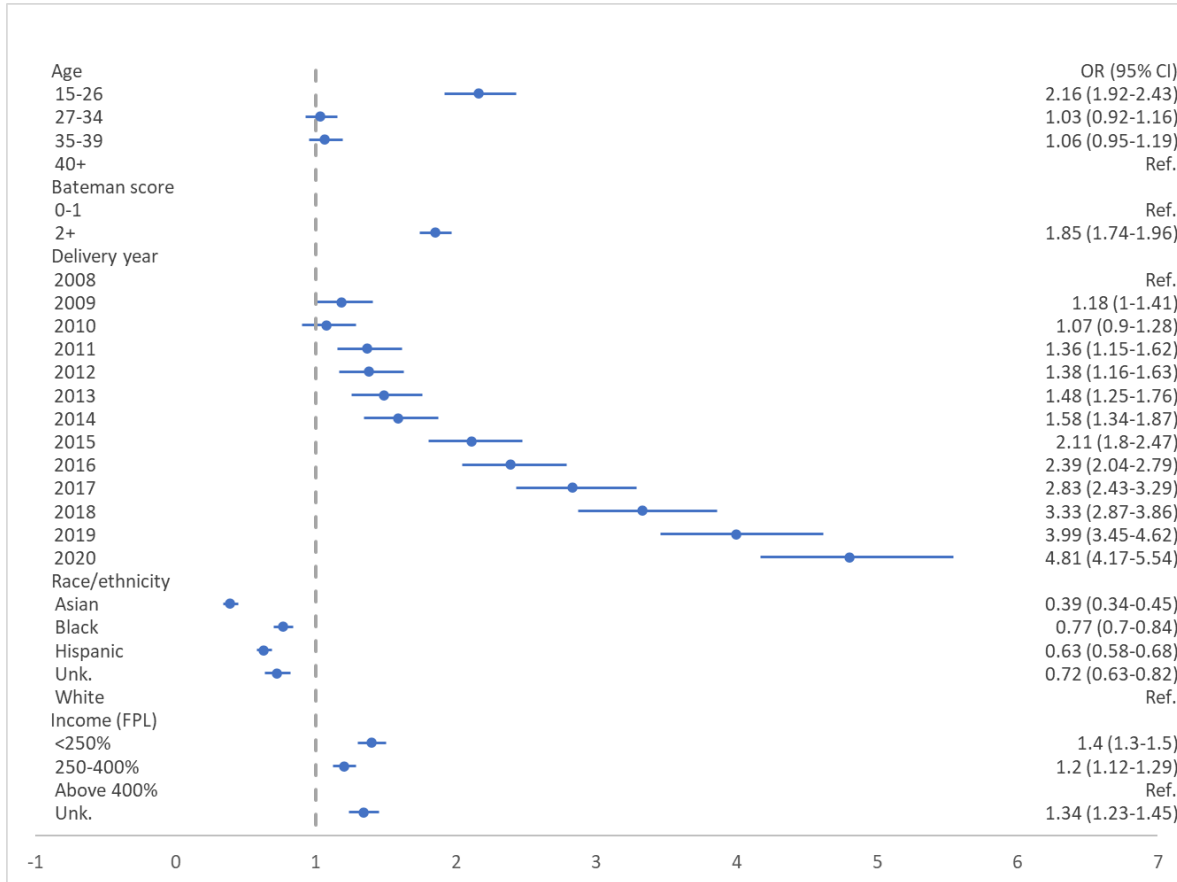





|             |       |             |          |       |             |          |
|-------------|-------|-------------|----------|-------|-------------|----------|
| OBCMI Score |       |             |          |       |             |          |
| 0-1         | (ref) | (ref)       | (ref)    | (ref) | (ref)       | (ref)    |
| 2+          | 1.48  | (1.39-1.58) | <0.0001* | 1.39  | (1.19-1.62) | <0.0001* |
| Poverty     |       |             |          |       |             |          |
| Unknown     | 1.46  | (1.33-1.6)  | <0.0001* | 1.02  | (0.84-1.23) | 0.8635   |
| <250%       | 1.38  | (1.28-1.5)  | <0.0001* | 1.06  | (0.89-1.26) | 0.4966   |
| 250-400%    | 1.23  | (1.14-1.33) | <0.0001* | 1.07  | (0.92-1.25) | 0.3776   |
| >400%       | (ref) | (ref)       | (ref)    | (ref) | (ref)       | (ref)    |

**Supplemental Exhibit 8. Forest plot of adjusted odds of PTSD diagnosis among those (a) with and (b) without PMAD.**

(a) with PMAD

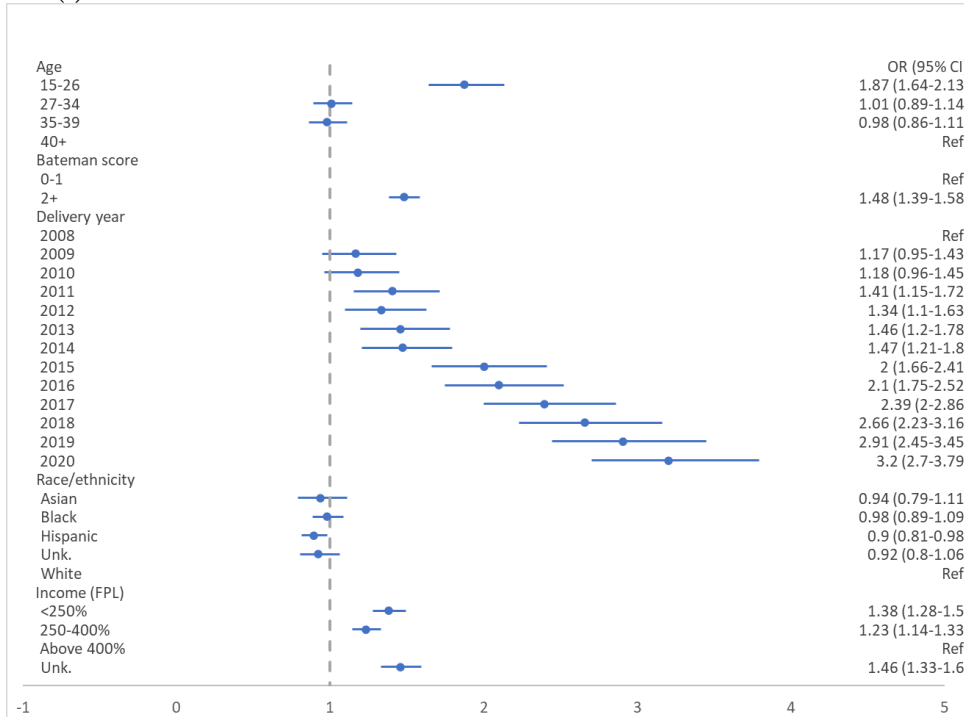

(b) without PMAD

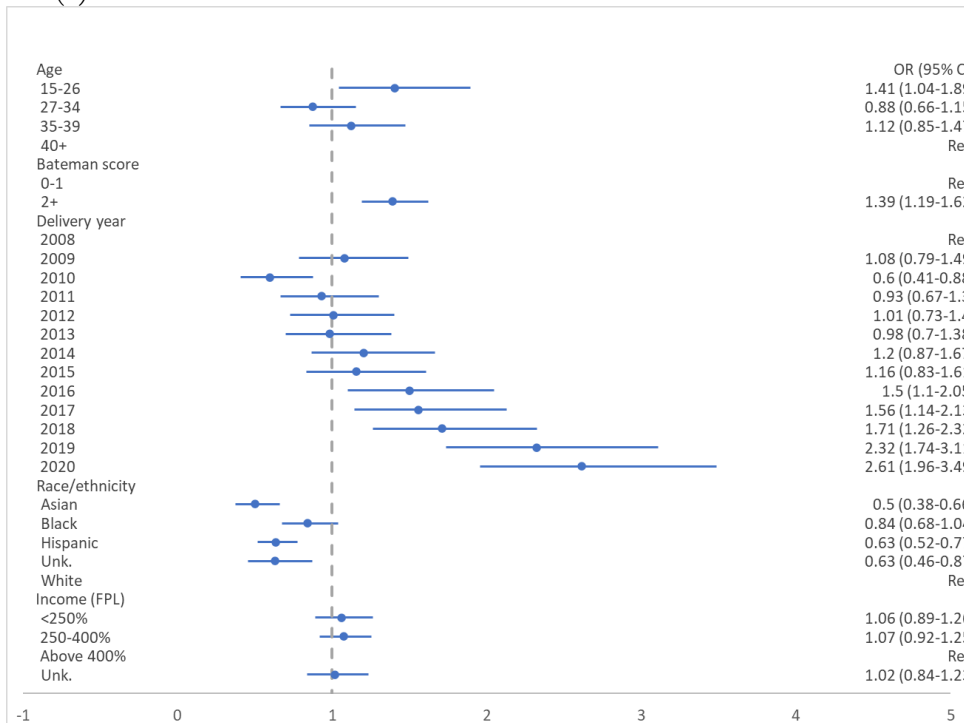

## Technical Appendix

### Multivariate Logistic Regression

Our unit of analysis was the delivery. We conducted a multivariable logistic regression with the dependent variable perinatal PTSD and the following independent variables: age, binary indicator for a Bateman score 2 or greater, race/ethnicity, federal poverty level, and year of delivery. We obtained predicted probabilities by year of delivery and race/ethnicity to assess disparities by race/ethnicity in adjusted trends in perinatal PTSD over time. Predicted probabilities were multiplied by 10,000 to produce rates per 10,000 deliveries.

We also ran the same model stratified by perinatal mood and anxiety disorder (PMAD) diagnoses.

N = 736,325 deliveries from 2008 to 2020

**Exhibit 2. Unadjusted and adjusted odds of PTSD diagnosis among delivering individuals 2008-2020.**

|               | Odds ratio<br>(95% confidence<br>interval) | Estimate | Standard<br>error | p-value |
|---------------|--------------------------------------------|----------|-------------------|---------|
| Delivery year |                                            |          |                   |         |
| 2008          | Ref.                                       |          |                   |         |
| 2009          | 1.18 (1-1.41)                              | 0.1683   | 0.08821           | 0.0564  |
| 2010          | 1.07 (0.9-1.28)                            | 0.07201  | 0.09046           | 0.426   |
| 2011          | 1.36 (1.15-1.62)                           | 0.3111   | 0.086             | 0.0003  |
| 2012          | 1.38 (1.16-1.63)                           | 0.3195   | 0.08535           | 0.0002  |
| 2013          | 1.48 (1.25-1.76)                           | 0.3952   | 0.08601           | <.0001  |
| 2014          | 1.58 (1.34-1.87)                           | 0.4604   | 0.08548           | <.0001  |
| 2015          | 2.11 (1.8-2.47)                            | 0.7468   | 0.08072           | <.0001  |
| 2016          | 2.39 (2.04-2.79)                           | 0.8695   | 0.07898           | <.0001  |
| 2017          | 2.83 (2.43-3.29)                           | 1.0388   | 0.07724           | <.0001  |
| 2018          | 3.33 (2.87-3.86)                           | 1.2026   | 0.07549           | <.0001  |
| 2019          | 3.99 (3.45-4.62)                           | 1.3849   | 0.07411           | <.0001  |
| 2020          | 4.81 (4.17-5.54)                           | 1.5697   | 0.07288           | <.0001  |
| Age           |                                            |          |                   |         |
| 15-26         | 2.16 (1.92-2.43)                           | 0.7696   | 0.06015           | <.0001  |
| 27-34         | 1.03 (0.92-1.16)                           | 0.03236  | 0.05727           | 0.572   |
| 35-39         | 1.06 (0.95-1.19)                           | 0.06162  | 0.05767           | 0.2853  |
| 40+           | Ref.                                       |          |                   |         |

|                             |                  |         |         |        |
|-----------------------------|------------------|---------|---------|--------|
| Race/ethnicity              |                  |         |         |        |
| Asian                       | 0.39 (0.34-0.45) | -0.9444 | 0.07328 | <.0001 |
| Black                       | 0.77 (0.7-0.84)  | -0.2673 | 0.04651 | <.0001 |
| Hispanic                    | 0.63 (0.58-0.68) | -0.4641 | 0.04313 | <.0001 |
| Unknown                     | 0.72 (0.63-0.82) | -0.3286 | 0.06463 | <.0001 |
| White                       | Ref.             |         |         |        |
| OBCMI score                 |                  |         |         |        |
| 0-1                         | Ref.             |         |         |        |
| 2+                          | 85 (1.74-1.96)   | 0.6144  | 0.03094 | <.0001 |
| Federal poverty level (FPL) |                  |         |         |        |
| <250%                       | 1.4 (1.3-1.5)    | 0.3331  | 0.03595 | <.0001 |
| 250-400%                    | 1.2 (1.12-1.29)  | 0.1844  | 0.03463 | <.0001 |
| >400%                       | Ref.             |         |         |        |
| Unknown/missing             | 1.34 (1.23-1.45) | 0.291   | 0.04156 | <.0001 |

**Supplemental Exhibit 7. Adjusted odds of PTSD diagnosis among those with PMAD.**

|                                    | <b>Odds ratio<br/>(95% confidence<br/>interval)</b> | <b>Estimate</b> | <b>Standard<br/>error</b> | <b>p-value</b> |
|------------------------------------|-----------------------------------------------------|-----------------|---------------------------|----------------|
| <b>Delivery year</b>               |                                                     |                 |                           |                |
| 2008                               | Ref.                                                |                 |                           |                |
| 2009                               | 1.08 (0.79-1.49)                                    | 0.1529          | 0.1057                    | 0.1481         |
| 2010                               | 0.6 (0.41-0.88)                                     | 0.168           | 0.1049                    | 0.1094         |
| 2011                               | 0.93 (0.67-1.3)                                     | 0.3412          | 0.1012                    | 0.0007         |
| 2012                               | 1.01 (0.73-1.4)                                     | 0.2893          | 0.1007                    | 0.0041         |
| 2013                               | 0.98 (0.7-1.38)                                     | 0.3782          | 0.101                     | 0.0002         |
| 2014                               | 1.2 (0.87-1.67)                                     | 0.3879          | 0.1011                    | 0.0001         |
| 2015                               | 1.16 (0.83-1.61)                                    | 0.6942          | 0.09475                   | <.0001         |
| 2016                               | 1.5 (1.1-2.05)                                      | 0.7416          | 0.09326                   | <.0001         |
| 2017                               | 1.56 (1.14-2.13)                                    | 0.873           | 0.09112                   | <.0001         |
| 2018                               | 1.71 (1.26-2.32)                                    | 0.9772          | 0.08919                   | <.0001         |
| 2019                               | 2.32 (1.74-3.11)                                    | 1.0667          | 0.08792                   | <.0001         |
| 2020                               | 2.61 (1.96-3.49)                                    | 1.164           | 0.08646                   | <.0001         |
| <b>Age</b>                         |                                                     |                 |                           |                |
| 15-26                              | 1.41 (1.04-1.89)                                    | 0.627           | 0.06665                   | <.0001         |
| 27-34                              | 0.88 (0.66-1.15)                                    | 0.01022         | 0.06369                   | 0.8726         |
| 35-39                              | 1.12 (0.85-1.47)                                    | -0.02147        | 0.06453                   | 0.7393         |
| 40+                                | Ref.                                                |                 |                           |                |
| <b>Race/ethnicity</b>              |                                                     |                 |                           |                |
| Asian                              | 0.5 (0.38-0.66)                                     | -0.06369        | 0.08667                   | 0.4624         |
| Black                              | 0.84 (0.68-1.04)                                    | -0.01901        | 0.05217                   | 0.7156         |
| Hispanic                           | 0.63 (0.52-0.77)                                    | -0.1104         | 0.04813                   | 0.0219         |
| Unknown                            | 0.63 (0.46-0.87)                                    | -0.07849        | 0.07102                   | 0.269          |
| White                              | Ref.                                                |                 |                           |                |
| <b>OBCMI score</b>                 |                                                     |                 |                           |                |
| 0-1                                | Ref.                                                |                 |                           |                |
| 2+                                 | 1.39 (1.19-1.62)                                    | 0.3935          | 0.03419                   | <.0001         |
| <b>Federal poverty level (FPL)</b> |                                                     |                 |                           |                |
| <250%                              | 1.06 (0.89-1.26)                                    | 0.3239          | 0.03992                   | <.0001         |
| 250-400%                           | 1.07 (0.92-1.25)                                    | 0.2108          | 0.03899                   | <.0001         |
| >400%                              | Ref.                                                |                 |                           |                |
| Unknown/missing                    | 1.02 (0.84-1.23)                                    | 0.3764          | 0.04642                   | <.0001         |

**Supplemental Exhibit 7. Adjusted odds of PTSD diagnosis among those without PMAD.**

|                                        | <b>Odds ratio<br/>(95% confidence interval)</b> | <b>Estimate</b> | <b>Standard<br/>error</b> | <b>p-value</b> |
|----------------------------------------|-------------------------------------------------|-----------------|---------------------------|----------------|
| <b>Delivery year</b>                   |                                                 |                 |                           |                |
| 2008                                   | Ref.                                            |                 |                           |                |
| 2009                                   | 1.17 (0.95-1.43)                                | 0.1529          | 0.1057                    | 0.1481         |
| 2010                                   | 1.18 (0.96-1.45)                                | 0.168           | 0.1049                    | 0.1094         |
| 2011                                   | 1.41 (1.15-1.72)                                | 0.3412          | 0.1012                    | 0.0007         |
| 2012                                   | 1.34 (1.1-1.63)                                 | 0.2893          | 0.1007                    | 0.0041         |
| 2013                                   | 1.46 (1.2-1.78)                                 | 0.3782          | 0.101                     | 0.0002         |
| 2014                                   | 1.47 (1.21-1.8)                                 | 0.3879          | 0.1011                    | 0.0001         |
| 2015                                   | 2 (1.66-2.41)                                   | 0.6942          | 0.09475                   | <.0001         |
| 2016                                   | 2.1 (1.75-2.52)                                 | 0.7416          | 0.09326                   | <.0001         |
| 2017                                   | 2.39 (2-2.86)                                   | 0.873           | 0.09112                   | <.0001         |
| 2018                                   | 2.66 (2.23-3.16)                                | 0.9772          | 0.08919                   | <.0001         |
| 2019                                   | 2.91 (2.45-3.45)                                | 1.0667          | 0.08792                   | <.0001         |
| 2020                                   | 3.2 (2.7-3.79)                                  | 1.164           | 0.08646                   | <.0001         |
| <b>Age</b>                             |                                                 |                 |                           |                |
| 15-26                                  | 1.87 (1.64-2.13)                                | 0.627           | 0.06665                   | <.0001         |
| 27-34                                  | 1.01 (0.89-1.14)                                | 0.01022         | 0.06369                   | 0.8726         |
| 35-39                                  | 0.98 (0.86-1.11)                                | -0.02147        | 0.06453                   | 0.7393         |
| 40+                                    | Ref.                                            |                 |                           |                |
| <b>Race/ethnicity</b>                  |                                                 |                 |                           |                |
| Asian                                  | 0.94 (0.79-1.11)                                | -0.06369        | 0.08667                   | 0.4624         |
| Black                                  | 0.98 (0.89-1.09)                                | -0.01901        | 0.05217                   | 0.7156         |
| Hispanic                               | 0.9 (0.81-0.98)                                 | -0.1104         | 0.04813                   | 0.0219         |
| Unknown                                | 0.92 (0.8-1.06)                                 | -0.07849        | 0.07102                   | 0.269          |
| White                                  | Ref.                                            |                 |                           |                |
| <b>Bateman score</b>                   |                                                 |                 |                           |                |
| 0-1                                    | Ref.                                            |                 |                           |                |
| 2+                                     | 1.48 (1.39-1.58)                                | 0.3935          | 0.03419                   | <.0001         |
| <b>Federal poverty level<br/>(FPL)</b> |                                                 |                 |                           |                |
| <250%                                  | 1.38 (1.28-1.5)                                 | 0.3239          | 0.03992                   | <.0001         |
| 250-400%                               | 1.23 (1.14-1.33)                                | 0.2108          | 0.03899                   | <.0001         |
| >400%                                  | Ref.                                            |                 |                           |                |
| Unknown/missing                        | 1.46 (1.33-1.6)                                 | 0.3764          | 0.04642                   | <.0001         |
